# Supplementary material
Source: publisher figshare collection journal article supplement (https://frontiersin.figshare.com/ndownloader/files/28733640)

Tree scale: 0.1

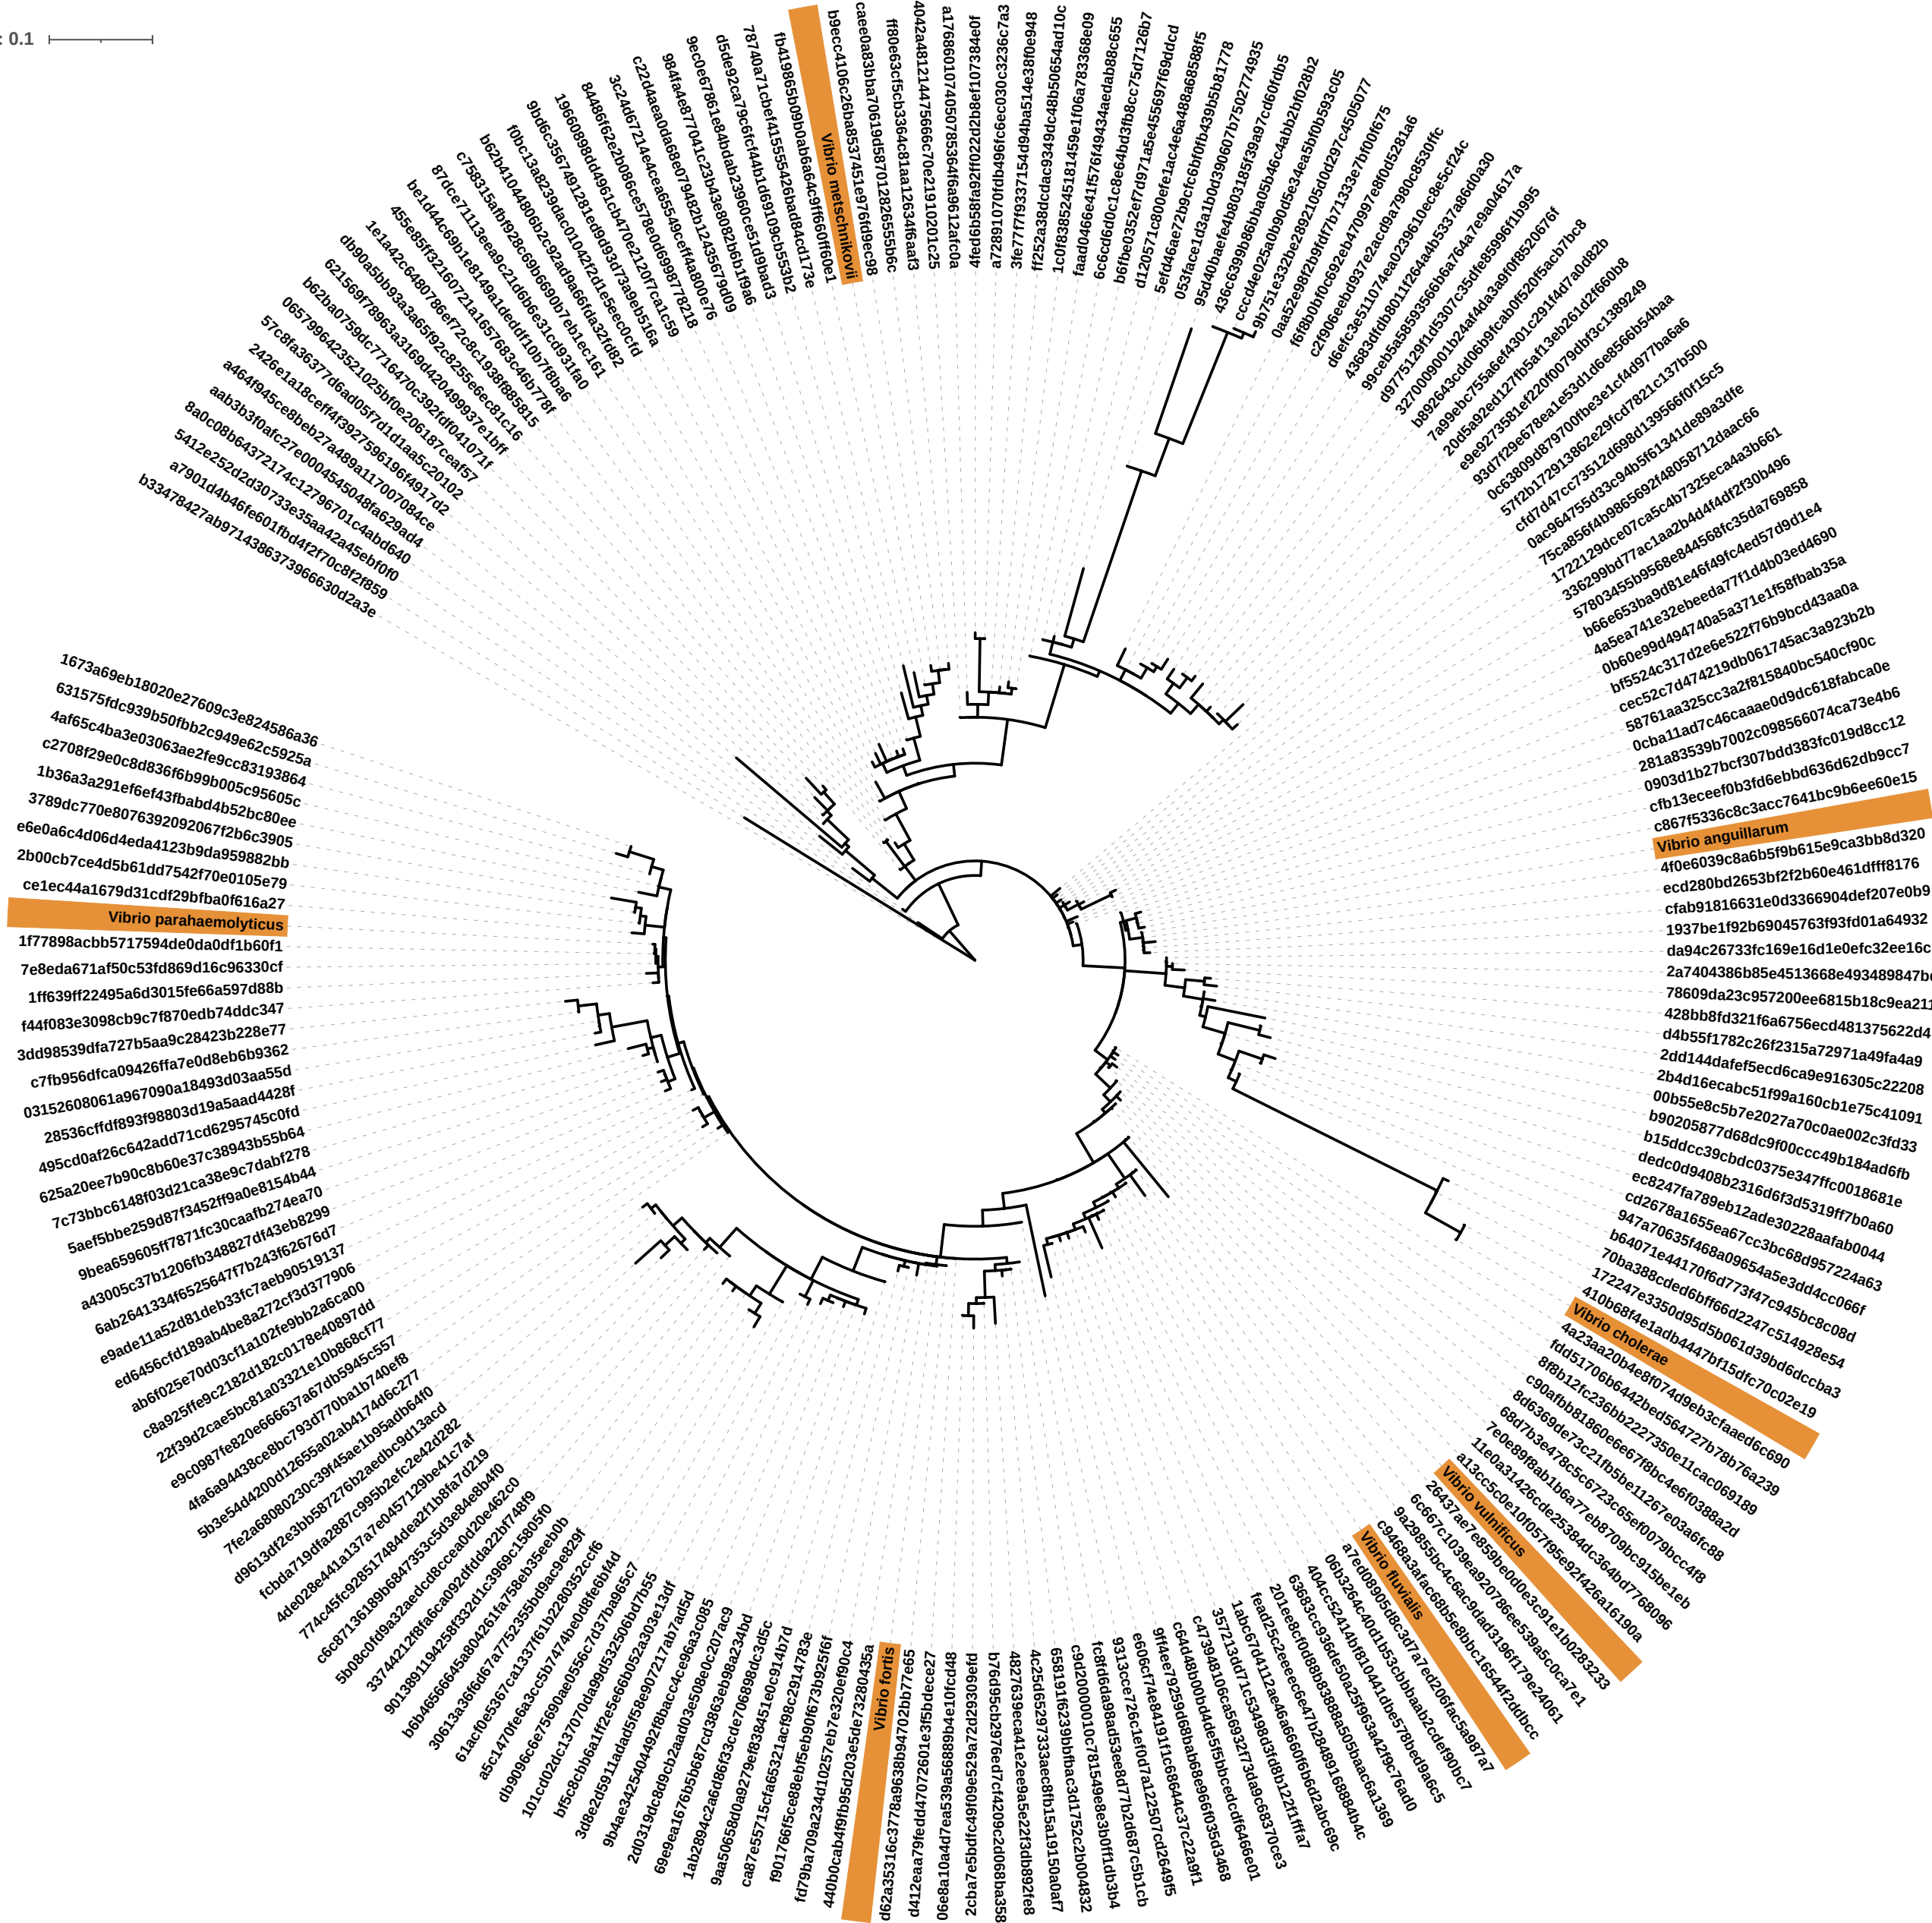

Supplement: Supplementary file [file 28733640]
